# Supplementary material
Source: Elsevier journal article supplement (https://www.sciencedirect.com/science/article/pii/S1413355518300418)
Supplement: mmc1 [file S1413355518300418:mmc1.docx]

**APPENDIX I**

**Versão curta da Escala de Vício no Smartphone**

1. Não consigo cumprir o trabalho planejado devido ao uso do celular

- Discordo Fortemente
- Discordo
- Discordo em Partes
- Concordo em Partes
- Concordo
- Concordo Fortemente

1. Tenho dificuldades de concentração durante as aulas, enquanto realizo tarefas ou trabalho devido ao uso do celular

- Discordo Fortemente
- Discordo
- Discordo em Partes
- Concordo em Partes
- Concordo
- Concordo Fortemente

1. Sinto dor nos punhos ou na parte de trás do pescoço enquanto uso o celular

- Discordo Fortemente
- Discordo
- Discordo em Partes
- Concordo em Partes
- Concordo
- Concordo Fortemente

1. Não sou capaz de ficar sem o meu celular

- Discordo Fortemente
- Discordo
- Discordo em Partes
- Concordo em Partes
- Concordo
- Concordo Fortemente

1. Sinto-me impaciente ou irritado quando não estou segurando meu celular

- Discordo Fortemente
- Discordo
- Discordo em Partes
- Concordo em Partes
- Concordo
- Concordo Fortemente

1. Tenho meu celular em mente mesmo quando não estou usando-o

- Discordo Fortemente
- Discordo
- Discordo em Partes
- Concordo em Partes
- Concordo
- Concordo Fortemente

1. Eu nunca vou parar de usar meu celular, mesmo que minha vida cotidiana seja muito afetada por isso

- Discordo Fortemente
- Discordo
- Discordo em Partes
- Concordo em Partes
- Concordo
- Concordo Fortemente

1. Constantemente checo meu celular para não perder conversas entre outras pessoas no Twitter ou no Facebook

- Discordo Fortemente
- Discordo
- Discordo em Partes
- Concordo em Partes
- Concordo
- Concordo Fortemente

1. Uso meu celular mais tempo do que tinha intenção

- Discordo Fortemente
- Discordo
- Discordo em Partes
- Concordo em Partes
- Concordo
- Concordo Fortemente

1. Pessoas ao meu redor, dizem que passo muito tempo no celular

- Discordo Fortemente
- Discordo
- Discordo em Partes
- Concordo em Partes
- Concordo
- Concordo Fortemente
